# Supplementary material for: Genomic, functional and structural analyses elucidate evolutionary innovation within the sea anemone 8 toxin family
Source: PubMed Central journal article supplement (PMC10210398; doi:10.1186/s12915-023-01617-y), 2023-05-24
Supplement: 12915_2023_1617_MOESM5_ESM.pdf [file 12915_2023_1617_MOESM5_ESM.pdf]

kDa

1 2 3 4 5 6 7

50

37

15

10

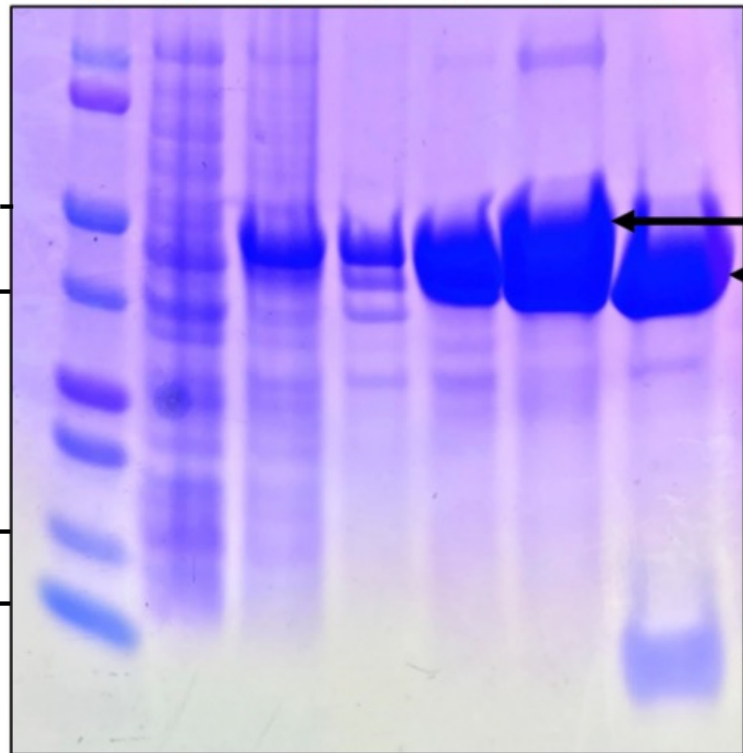

Uncleaved fusion protein (**MBP-SA8**) (~50 kDa)

Cleaved fusion protein (**MBP**) (~45 kDa)

**SA8**
