# Supplementary material for: Genomic, functional and structural analyses elucidate evolutionary innovation within the sea anemone 8 toxin family
Source: PubMed Central journal article supplement (PMC10210398; doi:10.1186/s12915-023-01617-y), 2023-05-24

**A**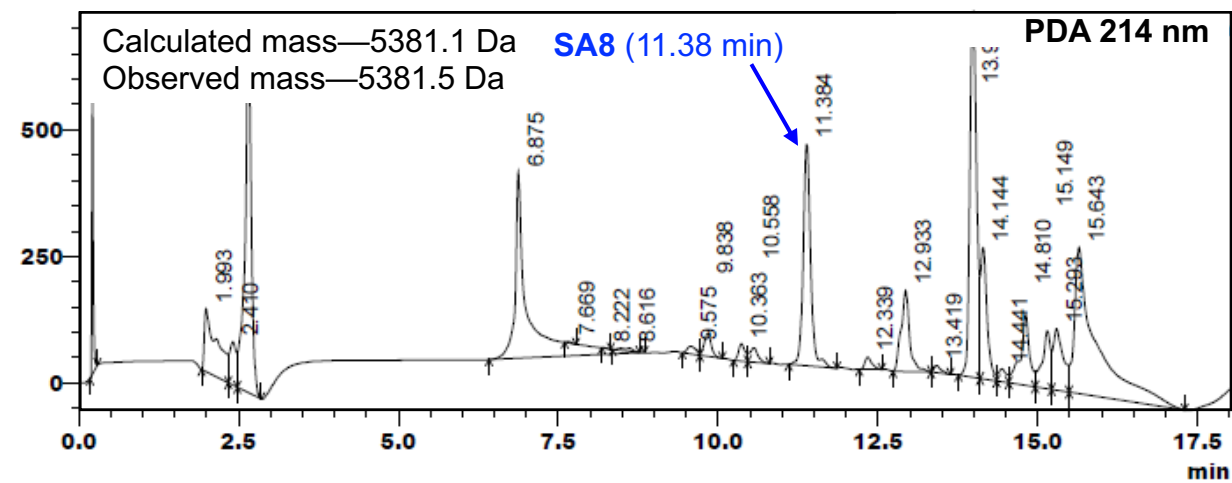**B**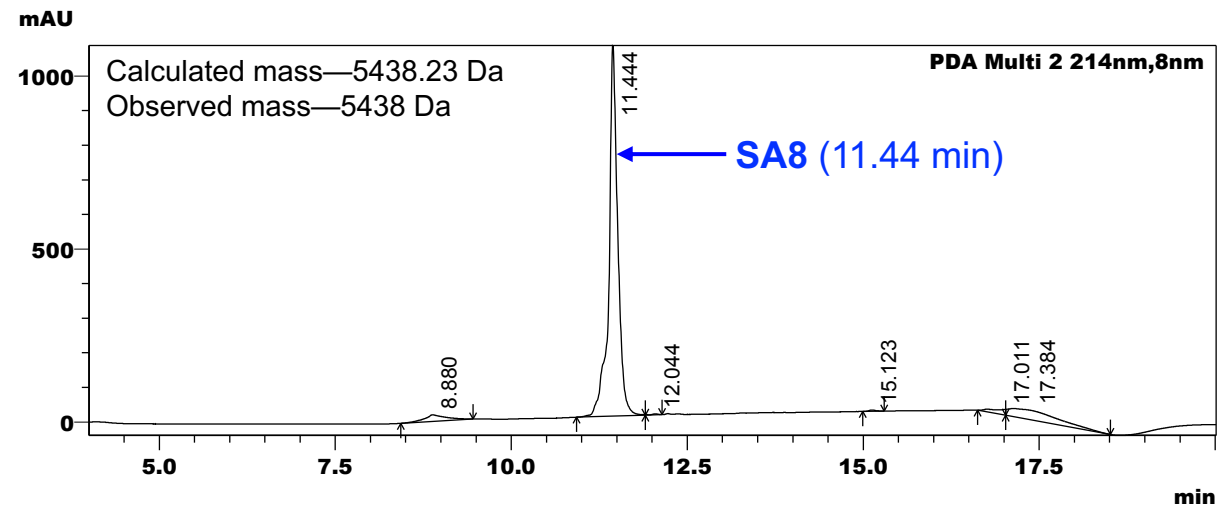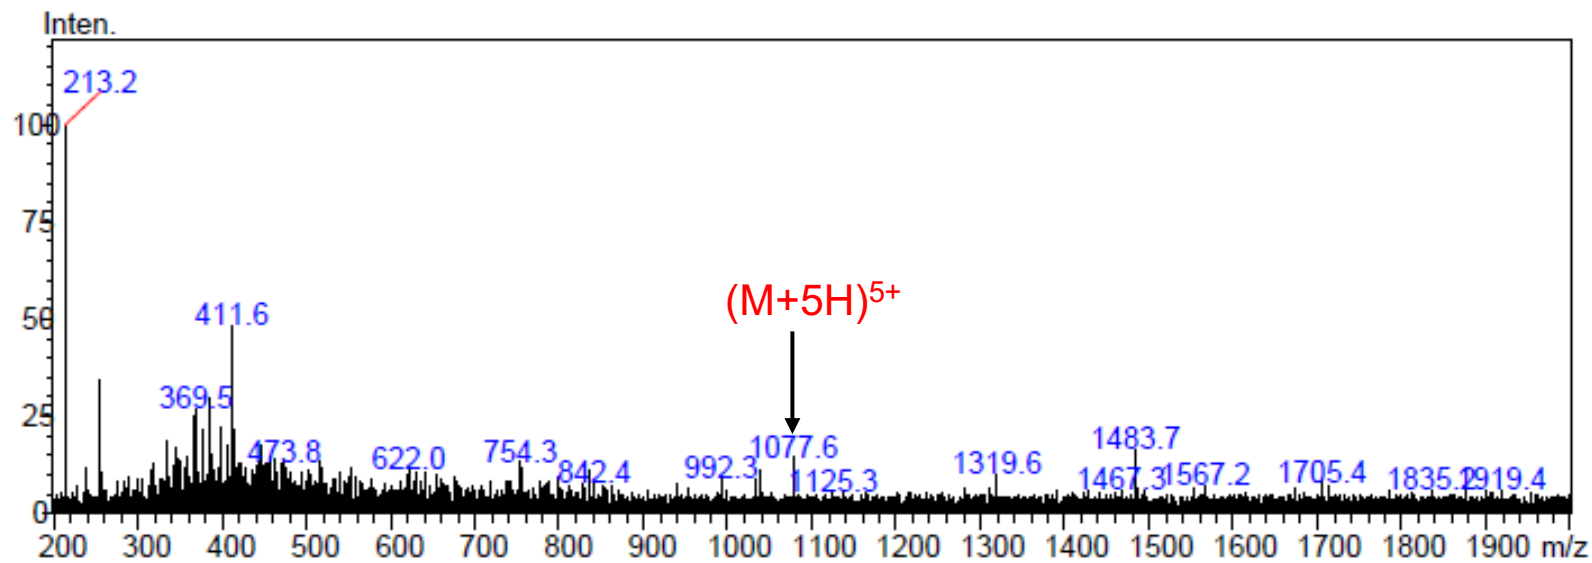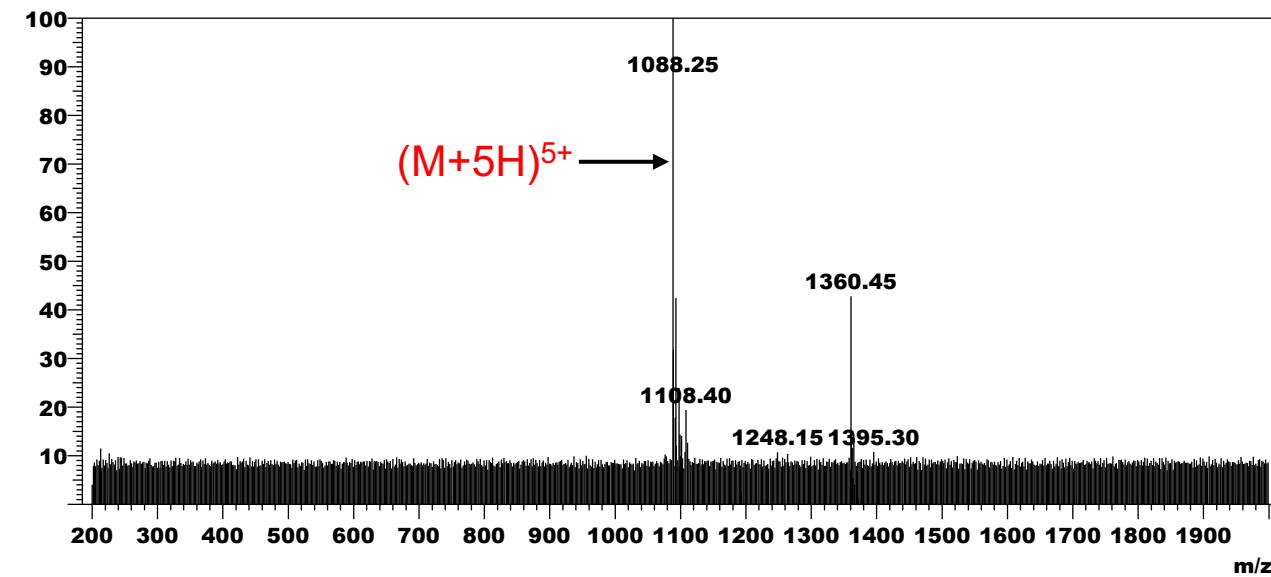

Supplement: 12915_2023_1617_MOESM7_ESM.pdf [file 12915_2023_1617_MOESM7_ESM.pdf]
